# Supplementary material
Source: ML conference proceedings conference paper supplement (https://openreview.net/forum?id=Lqv7VS1iBF)
Supplement: supplementary_material [file attachment]

---

# Supplementary Material: Stabilizing the Optimization of Neural Signed Distance Functions and Finer Shape Representation

---

Anonymous Author(s)

Affiliation

Address

email

## 1 Additional experiment results and details

### 2 1.1 Initialization of quadratic neurons

3 One layer in our network is represented by:

$$\mathbf{z}(\mathbf{x}) = \sigma \left[ l_1(\mathbf{x}) \cdot l_2(\mathbf{x}) + l_3(\mathbf{x}^2) \right], \quad (1)$$

4 where  $\cdot$  denotes the elementwise product.  $\sigma$  is the activation function, where we use the sinusoidal  
5 function as in SIREN[1].  $l_i$  represents the  $i$ th linear layer, which could be implemented by a standard  
6 linear layer module in PyTorch. There are two initializations proposed in DiGS[2] for shape INRs  
7 with linear neuron and sinusoidal activation, geometric initialization and multi-frequency geometric  
8 initialization (MFGI). In order to utilize the initializations designed for linear neurons, we initialize a  
9 quadratic neuron to approximately a linear neuron by setting  $\mathbf{w}_1, \mathbf{w}_3, \mathbf{b}_3$  to a very small value and  $\mathbf{b}_1$   
10 to 1. Then we apply the above-mentioned initializations to the  $l_2$  layer. In this way, the initialization  
11 of a quadratic neuron is approximate to the initialization of a single linear neuron.

### 12 1.2 Testing process

13 We use the marching cube algorithm[3] to extract the zero level set of the shape INR. The resolution  
14 is 512 and we use the same mesh generation procedure as in IGR[4].

### 15 1.3 Surface Reconstruction Benchmark(SRB)

#### 16 1.3.1 Training details

17 We use the preprocessing and evaluation method from DiGS[2] for the dataset. First, the input clouds  
18 are centered to zero and normalized the largest norm to 1. The bounding box is 1.1 times the size of  
19 the shape. In each iteration, we sample 15,000 points from the original point cloud and sample 15,000  
20 points uniformly randomly in a bounding box. We train for 10k iterations with a learning rate of  
21  $1e-4$ . The weights for loss terms are  $[50, 2000, 100, 100]$  for  $[\alpha_e, \alpha_m, \alpha_n, \alpha_l]$ . We use the annealing  
22 strategy for the weight of second-order regularization so that it will drop linearly to zero from the  
23 2kth to the 4kth iteration. The network has 5 hidden layers and 128 channels. The initialization for  
24 the  $l_2$  neuron is MFGI. The experiment is done on a single Tesla V100 16G GPU.

#### 25 1.3.2 Additional quantitative results

26 In Table 1 we provide a quantitative result of our method for each shape in the SRB dataset and  
27 compare it against other SoTA methods. we report the result for SAL from [5], IGR+FF and  
28 PHASE+FF from [6], IGR wo n/SIREN wo n/ DiGS from [2]. It shows that we achieve overall  
29 improved performance that other methods.

| Model     | Method     | Ground Truth |             | Scans       |             |
|-----------|------------|--------------|-------------|-------------|-------------|
|           |            | $d_C$        | $d_H$       | $d_C$       | $d_H$       |
| Overall   | IGR wo n   | 1.38         | 16.33       | 0.25        | 2.96        |
|           | SIREN wo n | 0.42         | 7.67        | 0.08        | <b>1.42</b> |
|           | SAL        | 0.36         | 7.47        | 0.13        | 3.50        |
|           | IGR+FF     | 0.96         | 11.06       | 0.32        | 4.75        |
|           | PHASE+FF   | 0.22         | 4.96        | <b>0.07</b> | 1.56        |
|           | DiGS       | 0.19         | 3.52        | 0.08        | 1.47        |
|           | Our StEik  | <b>0.18</b>  | <b>2.80</b> | 0.10        | 1.45        |
| Anchor    | IGR wo n   | 0.45         | 7.45        | 0.17        | 4.55        |
|           | SIREN wo n | 0.72         | 10.98       | 0.11        | 1.27        |
|           | SAL        | 0.42         | 7.21        | 0.17        | 4.67        |
|           | IGR+FF     | 0.72         | 9.48        | 0.24        | 8.89        |
|           | PHASE+FF   | 0.29         | 7.43        | <b>0.09</b> | 1.49        |
|           | DiGS       | 0.29         | 7.19        | 0.11        | 1.17        |
|           | Our StEik  | <b>0.26</b>  | <b>4.26</b> | 0.13        | <b>1.12</b> |
| Daratech  | IGR wo n   | 4.9          | 42.15       | 0.7         | 3.68        |
|           | SIREN wo n | 0.21         | 4.37        | 0.09        | 1.78        |
|           | SAL        | 0.62         | 13.21       | 0.11        | 2.15        |
|           | IGR+FF     | 2.48         | 19.6        | 0.74        | 4.23        |
|           | PHASE+FF   | 0.35         | 7.24        | <b>0.08</b> | <b>1.21</b> |
|           | DiGS       | 0.20         | 3.72        | 0.09        | 1.80        |
|           | Our StEik  | <b>0.18</b>  | <b>1.72</b> | 0.10        | 1.77        |
| DC        | IGR wo n   | 0.63         | 10.35       | 0.14        | 3.44        |
|           | SIREN wo n | 0.34         | 6.27        | 0.06        | <b>2.71</b> |
|           | SAL        | 0.18         | 3.06        | 0.08        | 2.82        |
|           | IGR+FF     | 0.86         | 10.32       | 0.28        | 3.98        |
|           | PHASE+FF   | 0.19         | 4.65        | <b>0.05</b> | 2.78        |
|           | DiGS       | <b>0.15</b>  | <b>1.70</b> | 0.07        | 2.75        |
|           | Our StEik  | 0.16         | 1.73        | 0.08        | 2.77        |
| Gargoyle  | IGR wo n   | 0.77         | 17.46       | 0.18        | 2.04        |
|           | SIREN wo n | 0.46         | 7.76        | 0.08        | <b>0.68</b> |
|           | SAL        | 0.45         | 9.74        | 0.21        | 3.84        |
|           | IGR+FF     | 0.26         | 5.24        | 0.18        | 2.93        |
|           | PHASE+FF   | <b>0.17</b>  | 4.79        | <b>0.07</b> | 1.58        |
|           | DiGS       | <b>0.17</b>  | <b>4.10</b> | 0.09        | 0.92        |
|           | Our StEik  | 0.18         | 4.49        | 0.10        | 0.87        |
| Lord Quas | IGR wo n   | 0.16         | 4.22        | 0.08        | 1.14        |
|           | SIREN wo n | 0.35         | 8.96        | 0.06        | <b>0.65</b> |
|           | SAL        | 0.13         | 4.14        | 0.07        | 4.04        |
|           | IGR+FF     | 0.49         | 10.71       | 0.14        | 3.71        |
|           | PHASE+FF   | <b>0.11</b>  | <b>0.71</b> | <b>0.05</b> | 0.74        |
|           | DiGS       | 0.12         | 0.91        | 0.06        | 0.70        |
|           | Our StEik  | 0.13         | 1.81        | 0.07        | 0.73        |

Table 1: Additional quantitative results on the Surface Reconstruction Benchmark[7] using only point data (no normals).

### 30 1.3.3 Additional visual results

31 In Figure 1 we provide visualization results for all shapes in SRB. The improvement is not so  
32 dramatic compared to DiGS because this SRB is a relatively easy task without many thin structures  
33 and complex structures, and DiGS already has a good performance. In the Anchor shape, which  
34 is the most difficult one, the edges are much sharper, and the hole is recovered much better in our  
35 reconstruction result.

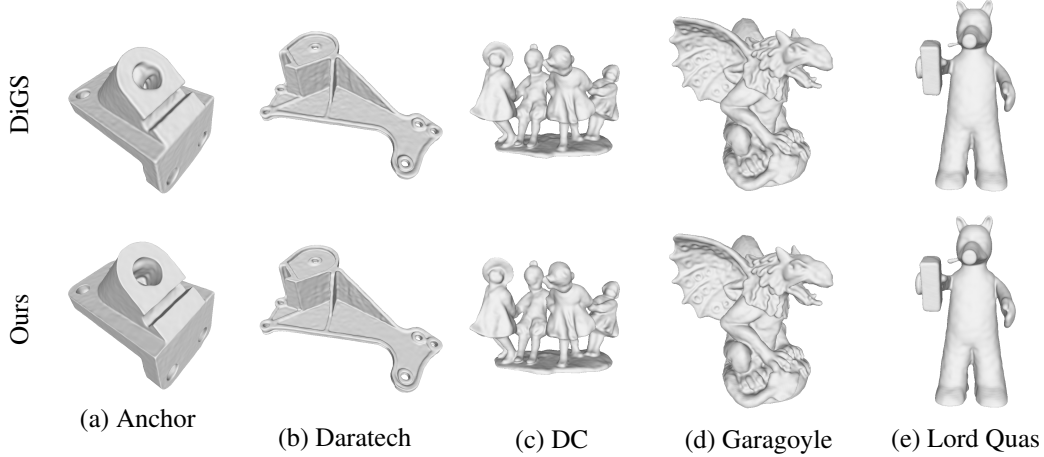

Figure 1: Visual results of SRB.

## 1.4 ShapeNet

### 1.4.1 Training details

We use the preprocessing and evaluation method from [8]. They first preprocess using the method from [9], then report on the first 20 shapes of the test set for each shape class. The preprocessing extracts ground truth surface points from the shapes of ShapeNet[10], and extracts random samples within the space with their labelled occupancy values. The evaluation method uses the ground truth points to calculate squared Chamfer distance, and uses the labelled random samples to calculate IoU. In each iteration, we sample 15,000 points from the original point cloud and sample 15,000 points uniformly randomly in a bounding box. We train for 10k iterations with a learning rate of 5e-5. The weights for loss terms are [50, 5000, 100, 100] for  $[\alpha_e, \alpha_m, \alpha_n, \alpha_l]$ . We use the annealing strategy for the weight of second-order loss so that it will drop linearly to zero from the 2kth to the 4kth iteration. The network has 5 hidden layers and 128 channels. The initialization for the  $l_2$  neuron is MFGI. The experiment is done on a single Tesla A100 80G GPU.

### 1.4.2 Additional quantitative results

In Table 2, we provide a quantitative result of our method for each shape in the ShapeNet dataset and compare it against other SoTA methods. we report the result for SAL from [5], SIREN wo n and DiGS from [2]. It shows that we achieve the best performance for most of the shapes.

### 1.4.3 Additional visual results

In Figure 2, we provide visualization results for some shapes in ShapeNet. Our method could remove some ghost geometries in lamps and benches, and recover complex topological structures like chair feet.

## 1.5 Scene Reconstruction

### 1.5.1 Training details

In each iteration, we sample 15,000 points from the original point cloud and sample 15,000 points uniformly randomly in a bounding box. We train for 100k iterations with a learning rate of 8e-6. The weights for loss terms are [50, 5000, 100, 10] for  $[\alpha_e, \alpha_m, \alpha_n, \alpha_l]$ . We use the annealing strategy for the weight of second-order loss so that it will drop linearly to zero from the 10kth to the 30kth iteration. The network has 8 hidden layers and 256 channels. The initialization for the  $l_2$  neuron is the initialization method proposed in SIREN[1]. The experiment is done on a single Tesla A100 80G GPU.

| Squared Chamfer |                |                   |         |                |                    |         |                |                 |         |
|-----------------|----------------|-------------------|---------|----------------|--------------------|---------|----------------|-----------------|---------|
| Methods         | Mean           | Overall<br>Median | Std     | Mean           | airplane<br>Median | Std     | Mean           | bench<br>Median | Std     |
| SIREN wo n      | 3.08e-4        | 2.58e-4           | 3.26e-4 | 2.42e-4        | 2.50e-4            | 5.92e-5 | 1.93e-4        | 1.67e-4         | 9.09e-5 |
| SAL             | 1.14e-3        | 2.11e-4           | 3.63e-3 | 5.98e-4        | 2.38e-4            | 9.22e-4 | 3.55e-4        | 1.71e-4         | 4.26e-4 |
| DiGS            | 1.32e-4        | 2.55e-5           | 4.73e-4 | 1.32e-5        | 1.01e-5            | 7.56e-6 | 7.26e-5        | 2.21e-5         | 1.74e-4 |
| Ours            | <b>6.86e-5</b> | <b>6.33e-6</b>    | 3.34e-4 | <b>3.33e-6</b> | <b>2.59e-6</b>     | 1.78e-6 | <b>7.90e-6</b> | <b>5.27e-6</b>  | 9.63e-6 |

  

| Methods    | Mean           | cabinet<br>Median | Std     | Mean           | car<br>Median  | Std     | Mean           | chair<br>Median | Std     |
|------------|----------------|-------------------|---------|----------------|----------------|---------|----------------|-----------------|---------|
| SIREN wo n | 3.16e-4        | 2.72e-4           | 1.72e-4 | 2.67e-4        | 2.58e-4        | 4.78e-5 | 2.63e-4        | 2.60e-4         | 1.31e-4 |
| SAL        | 2.81e-4        | 1.86e-4           | 1.81e-4 | 4.51e-4        | 2.74e-4        | 4.36e-4 | 1.28e-3        | 2.92e-4         | 2.05e-3 |
| DiGS       | 4.07e-4        | 4.45e-5           | 9.25e-4 | 7.89e-5        | 3.97e-5        | 1.10e-4 | 3.72e-4        | 2.73e-5         | 1.05e-3 |
| Ours       | <b>2.81e-5</b> | <b>1.01e-5</b>    | 3.90e-5 | <b>3.69e-5</b> | <b>1.11e-5</b> | 8.68e-5 | <b>1.24e-5</b> | <b>6.51e-6</b>  | 1.37e-5 |

  

| Methods    | Mean           | display<br>Median | Std     | Mean           | lamp<br>Median | Std     | Mean           | loudspeaker<br>Median | Std     |
|------------|----------------|-------------------|---------|----------------|----------------|---------|----------------|-----------------------|---------|
| SIREN wo n | 2.49e-4        | 2.20e-4           | 8.45e-4 | 6.10e-4        | 3.49e-4        | 1.04e-3 | 3.29e-4        | 3.04e-4               | 1.31e-4 |
| SAL        | 2.56e-4        | 8.86e-4           | 4.99e-4 | 5.86e-3        | 1.29e-3        | 9.35e-3 | 4.04e-4        | 2.63e-4               | 4.50e-4 |
| DiGS       | <b>3.16e-5</b> | 2.53e-5           | 2.32e-5 | 1.70e-4        | 2.18e-5        | 3.96e-4 | <b>1.18e-4</b> | 6.18e-5               | 2.15e-4 |
| Ours       | 4.62e-5        | <b>6.97e-6</b>    | 1.69e-4 | <b>5.75e-5</b> | <b>4.94e-6</b> | 1.59e-4 | 3.12e-4        | <b>2.79e-5</b>        | 5.56e-4 |

  

| Methods    | Mean           | rifle<br>Median | Std     | Mean           | sofa<br>Median | Std     | Mean           | table<br>Median | Std     |
|------------|----------------|-----------------|---------|----------------|----------------|---------|----------------|-----------------|---------|
| SIREN wo n | 5.44e-4        | 5.56e-4         | 1.44e-4 | 2.72e-4        | 2.66e-4        | 6.75e-5 | <b>2.29e-4</b> | 2.38e-4         | 8.40e-5 |
| SAL        | 2.18e-3        | 1.15e-4         | 5.17e-3 | 3.75e-4        | 1.93e-4        | 4.31e-4 | 1.82e-3        | 5.10e-4         | 4.31e-3 |
| DiGS       | 9.10e-6        | 5.26e-6         | 1.03e-5 | 5.76e-5        | 3.27e-5        | 5.39e-5 | 2.94e-4        | 2.98e-5         | 6.76e-4 |
| Ours       | <b>2.37e-6</b> | <b>2.03e-6</b>  | 1.40e-6 | <b>1.23e-5</b> | <b>8.00e-6</b> | 1.27e-5 | 3.62e-4        | <b>9.80e-6</b>  | 8.76e-4 |

  

| Methods    | Mean           | telephone<br>Median | Std     | Mean           | watercraft<br>Median | Std     |
|------------|----------------|---------------------|---------|----------------|----------------------|---------|
| SIREN wo n | 2.10e-4        | 1.86e-4             | 6.60e-5 | 2.97e-4        | 2.43e-4              | 1.26e-4 |
| SAL        | 1.04e-4        | 6.81e-5             | 7.99e-5 | 8.08e-4        | 2.06e-4              | 1.75e-3 |
| DiGS       | 1.77e-5        | 1.74e-5             | 4.49e-6 | 6.10e-5        | 2.43e-5              | 9.03e-5 |
| Ours       | <b>5.53e-6</b> | <b>4.63e-6</b>      | 2.61e-6 | <b>6.13e-6</b> | <b>4.25e-6</b>       | 6.53e-6 |

  

| IoU        |               |                   |        |               |                    |        |               |                 |        |
|------------|---------------|-------------------|--------|---------------|--------------------|--------|---------------|-----------------|--------|
| Methods    | Mean          | Overall<br>Median | Std    | Mean          | airplane<br>Median | Std    | Mean          | bench<br>Median | Std    |
| SIREN wo n | 0.3085        | 0.2952            | 0.2014 | 0.2248        | 0.1735             | 0.1103 | 0.4020        | 0.4231          | 0.1953 |
| SAL        | 0.4030        | 0.3944            | 0.2722 | 0.1908        | 0.1693             | 0.0955 | 0.2260        | 0.2311          | 0.1401 |
| DiGS       | 0.9390        | 0.9754            | 0.1262 | 0.9613        | 0.9577             | 0.0164 | 0.9061        | 0.9536          | 0.1413 |
| Ours       | <b>0.9671</b> | <b>0.9841</b>     | 0.0878 | <b>0.9814</b> | <b>0.9827</b>      | 0.0073 | <b>0.9607</b> | <b>0.9756</b>   | 0.0493 |

  

| Methods    | Mean          | cabinet<br>Median | Std    | Mean          | car<br>Median | Std    | Mean          | chair<br>Median | Std    |
|------------|---------------|-------------------|--------|---------------|---------------|--------|---------------|-----------------|--------|
| SIREN wo n | 0.3014        | 0.2564            | 0.1275 | 0.3336        | 0.3030        | 0.0997 | 0.4208        | 0.3748          | 0.2322 |
| SAL        | 0.6923        | 0.7224            | 0.1637 | 0.6261        | 0.6561        | 1525   | 0.2589        | 0.1491          | 0.2213 |
| DiGS       | 0.9261        | 0.9853            | 0.2137 | 0.9455        | 0.9765        | 0.0699 | 0.9082        | 0.9650          | 0.1523 |
| Ours       | <b>0.9889</b> | <b>0.9902</b>     | 0.0053 | <b>0.9624</b> | <b>0.9842</b> | 0.0621 | <b>0.9754</b> | <b>0.9767</b>   | 0.0150 |

  

| Methods    | Mean          | display<br>Median | Std    | Mean          | lamp<br>Median | Std    | Mean          | loudspeaker<br>Median | Std    |
|------------|---------------|-------------------|--------|---------------|----------------|--------|---------------|-----------------------|--------|
| SIREN wo n | 0.3566        | 0.3123            | 0.1790 | 0.3055        | 0.2573         | 0.2598 | 0.2229        | 0.1724                | 0.1575 |
| SAL        | 0.5067        | 0.5801            | 0.2474 | 0.1689        | 0.0698         | 0.1994 | 0.6702        | 0.7264                | 0.1976 |
| DiGS       | 0.9839        | 0.9886            | 0.0102 | 0.8776        | 0.9646         | 0.1943 | 0.9632        | 0.9851                | 0.0978 |
| Ours       | <b>0.9850</b> | <b>0.9870</b>     | 0.0084 | <b>0.9290</b> | <b>0.9776</b>  | 0.1337 | <b>0.9710</b> | <b>0.9877</b>         | 0.0681 |

  

| Methods    | Mean          | rifle<br>Median | Std    | Mean          | sofa<br>Median | Std    | Mean          | table<br>Median | Std    |
|------------|---------------|-----------------|--------|---------------|----------------|--------|---------------|-----------------|--------|
| SIREN wo n | 0.0265        | 0.0092          | 0.0554 | 0.3397        | 0.3444         | 0.1206 | 0.3797        | 0.3603          | 0.1528 |
| SAL        | 0.2835        | 0.2821          | 0.1530 | 0.4844        | 0.4530         | 0.1404 | 0.0965        | 0.0320          | 0.1502 |
| DiGS       | 0.9486        | 0.9567          | 0.0281 | 0.9572        | 0.9807         | 0.0896 | <b>0.8943</b> | 0.9720          | 0.1996 |
| Ours       | <b>0.9772</b> | <b>0.9830</b>   | 0.0123 | <b>0.9859</b> | <b>0.9894</b>  | 0.0089 | 0.8830        | <b>0.9742</b>   | 0.2446 |

  

| Methods    | Mean          | telephone<br>Median | Std    | Mean          | watercraft<br>Median | Std    |
|------------|---------------|---------------------|--------|---------------|----------------------|--------|
| SIREN wo n | 0.3778        | 0.3806              | 0.2590 | 0.3190        | 0.3007               | 0.1877 |
| SAL        | 0.6025        | 0.6704              | 0.2203 | 0.4170        | 0.4728               | 0.2367 |
| DiGS       | 0.9854        | 0.9876              | 0.0071 | 0.9522        | 0.9735               | 0.0504 |
| Ours       | <b>0.9866</b> | <b>0.9883</b>       | 0.0051 | <b>0.9858</b> | <b>0.9894</b>        | 0.0090 |

Table 2: Additional quantitative results on the ShapeNet dataset[10] using only point data (no normals).



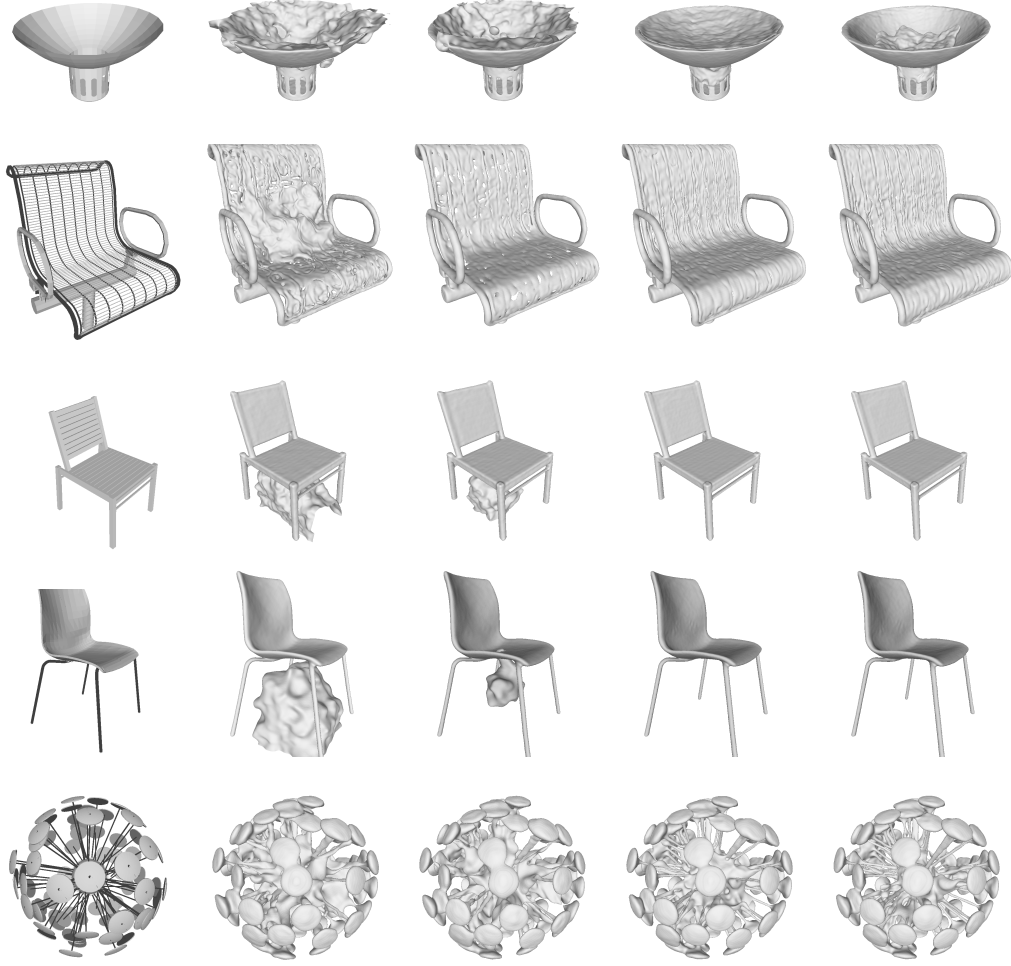

(a) Ground Truth (b) DiGS (c) Linear +  $L_{L.n.}$  (d) Quadratic +  $L_{div}$  (e) Ours

Figure 2: Additional visual results of ShapeNet.

## 1.5.2 Additional visual result

In Figure 3, we provide more visual results for the scene reconstruction from different angles in a higher resolution. It's clear to see that our method could recover more thin structures and fine details.

## 2 Derivations of functional gradients

**2.1 Gradients for  $L_{div}(u) = \int_{\Omega} |\Delta u(x)|^p dx$**

When  $p = 2$  and adding a factor  $\frac{1}{2}$ , we have

$$\begin{aligned}
 -\nabla_u L_{div} &= -\nabla^2 \cdot \frac{\partial L}{\partial (D^2 u)} \\
 &= -\nabla^2 \cdot (\Delta u \mathbf{I}) \\
 &= -\Delta[\Delta u]
 \end{aligned} \tag{2}$$

where  $L$  denotes the integrand and  $\mathbf{I}$  an identity matrix. The first equations comes from the Euler-Lagrange equation and the first zero and first order parts are eliminated.

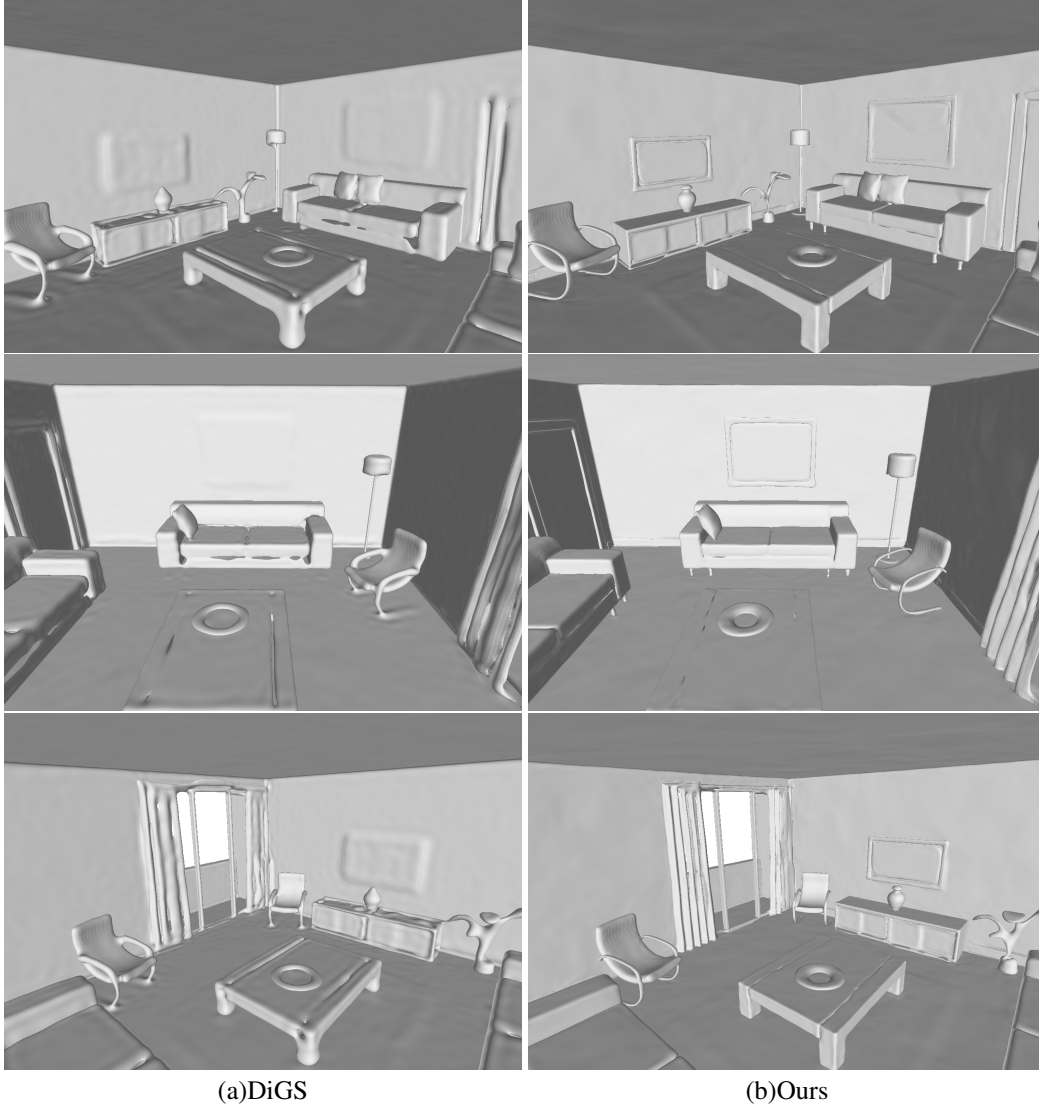

Figure 3: Visual results of scene reconstruction.

74 For  $p = 1$ , the derivation is similar as follows,

$$\begin{aligned}
 -\nabla_u L_{\text{div}} &= -\nabla^2 \cdot \frac{\partial L}{\partial (D^2 u)} \\
 &= -\nabla^2 \cdot \left( \frac{\Delta u \mathbf{I}}{|\Delta u|} \right) \\
 &= -\Delta [\text{sgn}(\Delta u)]
 \end{aligned} \tag{3}$$

75 **2.2 Gradient for**  $L_{\text{L.n.}}(u) = \int_{\Omega} |\nabla u(x)^T D^2 u(x) \nabla u(x)| \, dx$

76 In the implementation, we normalize the gradient of  $u$  to reduce the weight tuning overheads. This  
77 formula is converted as

$$L_{\text{L.n.}}(u) = \int_{\Omega} \left| \frac{\nabla u(x)^T D^2 u(x) \nabla u(x)}{\|\nabla u\|^2} \right| \, dx \tag{4}$$

However, we note that these two expressions are equivalent when the eikonal loss is minimized. We use the unnormalized version to compute the gradient for simplicity. One may notice that the inner

part of equation (4) computes the second order derivative along the normal direction, which equals to the divergence subtracting the orthonormal tangential components

$$\Delta u - \sum_i^{n-1} t_i^T D^2 u t_i$$

78 where  $t_i$ ,  $i = 1, \dots, n-1$  denotes the orthonormal tangent vectors that span the tangent subspace.  
79 Hence we could rewrite equation (4) as

$$L_{\text{L.n.}}(u) = \int_{\Omega} \left| \Delta u - \sum_i^{n-1} t_i^T D^2 u t_i \right| dx \quad (5)$$

80 The negative gradient can be computed using Euler-Lagrange equation as follows,

$$-\nabla_u L_{\text{L.n.}} = \underbrace{\nabla \cdot \frac{\partial L}{\partial(\nabla u)}}_1 - \underbrace{\nabla^2 \cdot \frac{\partial L}{\partial(D^2 u)}}_2 \quad (6)$$

81 Only the term 2 in equation (6) would contain a fourth order term. Therefore we expand term 2 in the  
82 following,

$$\begin{aligned} \nabla^2 \cdot \frac{\partial L}{\partial(D^2 u)} &= \nabla^2 \cdot \left( \frac{\Delta u - \sum_i^{n-1} t_i^T D^2 u t_i}{|\Delta u - \sum_i^{n-1} t_i^T D^2 u t_i|} \left( \frac{\partial(\Delta u)}{\partial(D^2 u)} - \frac{\partial(\sum_i^{n-1} t_i^T D^2 u t_i)}{\partial(D^2 u)} \right) \right) \\ &= \nabla^2 \cdot \left( \frac{\Delta u - \sum_i^{n-1} t_i^T D^2 u t_i}{|\Delta u - \sum_i^{n-1} t_i^T D^2 u t_i|} \left( \mathbf{I} - \frac{\partial(\sum_i^{n-1} t_i^T D^2 u t_i)}{\partial(D^2 u)} \right) \right) \end{aligned} \quad (7)$$

83 From  $\Delta u$  and  $\mathbf{I}$ , we can get  $\nabla^2 \cdot (\Delta u) = \Delta[\Delta u]$  as mentioned in the paper, factored by  
84  $\frac{1}{|\Delta u - \sum_i^{n-1} t_i^T D^2 u t_i|}$ .

85 **2.3 Gradients for  $L_{\text{eik}}(u) = \frac{1}{2} \int_{\Omega} |||\nabla u|| - 1|^p dx$**

86 The negative gradient for the above equation (for  $p = 2$ ) is

$$\begin{aligned} -\nabla_u L_{\text{eik}} &= -\frac{\partial L}{\partial u} + \nabla \cdot \frac{\partial L}{\partial(\nabla u)} \\ &= \nabla \cdot \frac{\partial L}{\partial(\nabla u)} \\ &= \nabla \cdot \left( \frac{\|\nabla u\| - 1}{\|\nabla u\|} \nabla u \right) \\ &= \nabla \cdot \left( \left( 1 - \frac{1}{\|\nabla u\|} \right) \nabla u \right) \\ &= \left( 1 - \frac{1}{\|\nabla u\|} \right) \Delta u + \nabla u \cdot \nabla \left( 1 - \frac{1}{\|\nabla u\|} \right) \\ &= \left( 1 - \frac{1}{\|\nabla u\|} \right) \Delta u - \nabla u \cdot \nabla \frac{1}{\|\nabla u\|} \\ &= \left( 1 - \frac{1}{\|\nabla u\|} \right) \Delta u + \frac{1}{\|\nabla u\|^2} \nabla u \cdot \nabla \|\nabla u\| \\ &= \left( 1 - \frac{1}{\|\nabla u\|} \right) \Delta u + \frac{1}{\|\nabla u\|} \left( \frac{\nabla u^T}{\|\nabla u\|} [\nabla^2 u] \frac{\nabla u}{\|\nabla u\|} \right) \\ &= \left( 1 - \frac{1}{\|\nabla u\|} \right) (u_{\eta\eta} + \sum_i^{n-1} u_{\xi_i \xi_i}) + \frac{1}{\|\nabla u\|} u_{\eta\eta} \end{aligned} \quad (8)$$

$$= u_{\eta\eta} + \left(1 - \frac{1}{\|\nabla u\|}\right) \sum_i^{n-1} u_{\xi_i \xi_i} \quad (9)$$

where the first equality is from the Euler-Lagrange equation. We remove the variable  $x$  for simplicity. Equation (8) is demonstrated in the paper and the remaining part decomposes the second order derivatives into the normal direction  $\eta$  and the tangential directions  $\xi_i$ . Equation (9) shows that minimizing the squared eikonal loss comes down to a stable diffusion along the normal direction and instable diffusion in all tangential directions.

Similarly, for  $p = 1$ , we have

$$\begin{aligned} -\nabla_u L_{\text{eik}} &= -\frac{\partial L}{\partial u} + \nabla \cdot \frac{\partial L}{\partial(\nabla u)} \\ &= \nabla \cdot \left( \frac{\|\nabla u\| - 1}{\|\nabla u\| - 1} \frac{\nabla u}{\|\nabla u\|} \right) \\ &= \nabla \cdot \left( \frac{\text{sgn}(\|\nabla u\| - 1)}{\|\nabla u\|} \nabla u \right) \end{aligned} \quad (10)$$

$$\begin{aligned} &= \frac{\|\nabla u\| - 1}{\|\nabla u\| - 1} \Delta u + \nabla u \cdot \nabla \left( \frac{\|\nabla u\| - 1}{\|\nabla u\| - 1} \frac{1}{\|\nabla u\|} \right) \\ &= \frac{(\|\nabla u\| - 1) \Delta u + \nabla u \cdot \left( \nabla \|\nabla u\| - \frac{\|\nabla u\| - 1}{\|\nabla u\|} \nabla \|\nabla u\| - \frac{(\|\nabla u\| - 1)^2}{\|\nabla u\|^2} \nabla \|\nabla u\| \right)}{\|\nabla u\| - 1} \\ &= \frac{(\|\nabla u\| - 1) \Delta u - \frac{\|\nabla u\| - 1}{\|\nabla u\|} \nabla u \cdot \nabla \|\nabla u\|}{\|\nabla u\| - 1} \\ &= \frac{(\|\nabla u\| - 1) \left( \Delta u - \frac{\nabla u}{\|\nabla u\|} \cdot \nabla \|\nabla u\| \right)}{\|\nabla u\| - 1} \\ &= \frac{\text{sgn}(\|\nabla u\| - 1)}{\|\nabla u\|} \left( \Delta u - \frac{\nabla u^T}{\|\nabla u\|} [\nabla^2 u] \frac{\nabla u}{\|\nabla u\|} \right) \\ &= \frac{\text{sgn}(\|\nabla u\| - 1)}{\|\nabla u\|} \left( \left( \sum_i^{n-1} u_{\xi_i \xi_i} + u_{\eta\eta} \right) - u_{\eta\eta} \right) \\ &= \frac{\text{sgn}(\|\nabla u\| - 1)}{\|\nabla u\|} \sum_i^{n-1} u_{\xi_i \xi_i} \end{aligned} \quad (11)$$

Comparing against  $p = 2$ , the absolute value of the eikonal loss ( $p = 1$ ) leads to instable diffusion along all tangential directions and no constraints in the normal direction.

**2.4 Gradients for  $L_{\text{norm.}}(u) = \int_{\Omega_o} \|\nabla u(x) - N_{gt}\|^p dx$**

For  $p = 2$ , we could get

$$\begin{aligned} -\nabla_u L_{\text{norm.}} &= -\frac{\partial L}{\partial u} + \nabla \cdot \frac{\partial L}{\partial(\nabla u)} \\ &= 2\nabla \cdot (\nabla u - N_{gt}) \\ &= 2\Delta u - 2\text{div}(N_{gt}) \end{aligned} \quad (12)$$

97 Not that factor 2 was omitted in the full paper for simplicity. For  $p = 1$ , we have

$$\begin{aligned}
-\nabla_u L_{\text{norm.}} &= -\frac{\partial L}{\partial u} + \nabla \cdot \frac{\partial L}{\partial(\nabla u)} \\
&= \nabla \cdot \left( \frac{\nabla u - N_{gt}}{\|\nabla u - N_{gt}\|} \right) \\
&= \Delta u - \nabla \left( \frac{1}{\|\nabla u - N_{gt}\|} \right) \cdot N_{gt} \\
&= \Delta u + \frac{N_{gt}^T D^2 u \nabla u}{\|\nabla u - N_{gt}\|^3}
\end{aligned} \tag{13}$$

### 98 3 Choices of $p$ in the eikonal loss

#### 99 3.1 Influence on the instability

100 Given the equations (11) and (9), both exhibit instability in the tangential directions. While the  
101 coefficients of the diffusion terms are different, it is not straightforward to justify the effectiveness of  
102 one over the other. However, we show empirically that  $p = 1$  achieves better results on SRB, present  
103 in the next subsection.

#### 104 3.2 Ablation Study of the performance

105 We investigate the effects of design choices made for regularization terms and report the averages  
106 over all shapes in the dataset in Table 3. We demonstrate that if we choose  $p = 1$  for both first-order  
107 and second-order regularization, the algorithm will achieve the best performance.

| $L_{\text{eik}}$ | $L_{\text{L.n.}}$ | GT           |              | Scans           |                 |
|------------------|-------------------|--------------|--------------|-----------------|-----------------|
|                  |                   | $d_C$        | $d_H$        | $d_{\tilde{C}}$ | $d_{\tilde{H}}$ |
| L1               | L1                | <b>0.180</b> | <b>2.800</b> | <b>0.096</b>    | <b>1.454</b>    |
| L1               | L2                | 0.205        | 4.389        | 0.105           | 1.486           |
| L2               | L1                | 0.194        | 3.917        | 0.469           | 1.486           |
| L2               | L2                | 0.217        | 4.844        | 0.093           | 1.483           |

Table 3: Ablation study of regularization terms on SRB[7]

### 108 4 Additional results on the eikonal instability

109 We showed in Fig. 1 (in the full paper), with quadratic networks, the instability incurred by the  
110 eikonal loss when divergence terms are removed. Linear networks, though even less complex, will  
111 encounter the eikonal instability as well according to our analysis. We demonstrate additional results  
112 in Fig. 4 with linear networks and SIREN.

### 113 5 Ablation study on regularization weight

114 We have conducted this experiment on SRB varying regularization weights. It shows that around the  
115 optimal weight choice, the results are not sensitive. Furthermore, increasing the weight beyond the  
116 optimal, only degrades results slightly since that simply enforces further a constraint that is true of  
117 all SDFs, without smoothing the geometry much. This is consistent Lagrange multiplier theory for  
118 enforcing a constraint into the optimization problem.

### 119 6 Ablation study on SRB dataset of Regularizations & Linear vs Quad Layers

120 In Table 5, we study the effectiveness of each of our novel contributions (the Laplacian normal  
121 regularization and quadratic layers) on the SRB dataset. We get a better result with linear networks

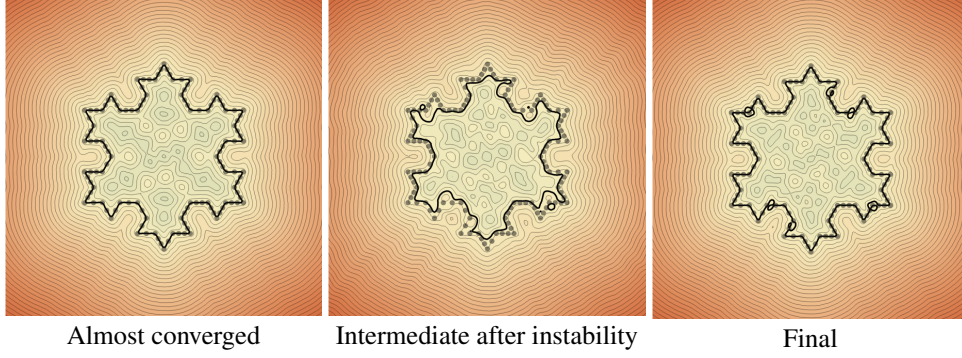

Figure 4: Instability on linear networks. (*left*) The evolution is almost converged. (*middle*) However, after several additional iterations, instability occurs. We show the intermediate results 50 steps after the instability. (*right*) This instability drives the network to a sub-optimal local minimizer.

| $\alpha_l$ | GT    |       | Scans           |                 |
|------------|-------|-------|-----------------|-----------------|
|            | $d_C$ | $d_H$ | $d_{\tilde{C}}$ | $d_{\tilde{H}}$ |
| 10         | 0.264 | 6.089 | 0.099           | 1.513           |
| 50         | 0.191 | 3.799 | 0.096           | 1.485           |
| 100*       | 0.180 | 2.800 | 0.096           | 1.453           |
| 200        | 0.188 | 3.520 | 0.097           | 1.495           |
| 300        | 0.192 | 3.497 | 0.102           | 1.535           |
| 400        | 0.187 | 3.177 | 0.102           | 1.537           |
| 500        | 0.194 | 3.557 | 0.098           | 1.499           |

Table 4: Varying  $\alpha_l$  and performance. The relationship between  $\alpha_l$  and the performance is not salient. We may mention that the weight needs to be tuned based on different tasks, but a relatively larger weight is preferred given the annealing strategy.

122 if we replace the divergence in [2] with our Laplacian normal. Also replacing linear with quadratic  
123 layers, irrespective of regularization leads to better results. The combination of the two produces the  
124 best results. All the experiments are run under the same hyper-parameters.

| Method                         | GT           |              | Scans           |                 |
|--------------------------------|--------------|--------------|-----------------|-----------------|
|                                | $d_C$        | $d_H$        | $d_{\tilde{C}}$ | $d_{\tilde{H}}$ |
| Lin+ $L_{\text{div}}$          | 0.190        | 4.397        | 0.099           | 1.446           |
| Lin+ $L_{\text{L. n.}}$        | 0.188        | 4.321        | 0.100           | 1.498           |
| Qua+ $L_{\text{div}}$          | 0.187        | 3.597        | 0.098           | 1.496           |
| Ours(Qua+ $L_{\text{L. n.}}$ ) | <b>0.180</b> | <b>2.800</b> | 0.096           | 1.454           |

Table 5: Ablation study on the Surface Reconstruction Benchmark[7] using only point data (no normals).

## References

- 125 [1] V. Sitzmann, J. N. P. Martel, A. W. Bergman, D. B. Lindell, and G. Wetzstein, *Implicit neural representations with periodic activation functions*, 2020. arXiv: 2006.09661 [cs.CV].
- 126 [2] Y. Ben-Shabat, C. H. Koneputugodage, and S. Gould, *Digs : Divergence guided shape implicit neural representation for unoriented point clouds*, 2022. arXiv: 2106.10811 [cs.CV].
- 127 [3] W. E. Lorensen and H. E. Cline, “Marching cubes: A high resolution 3d surface construction algorithm,” *SIGGRAPH Comput. Graph.*, vol. 21, no. 4, pp. 163–169, Aug. 1987, ISSN: 0097-8930. DOI: 10.1145/37402.37422. [Online]. Available: <https://doi.org/10.1145/37402.37422>.
- 128 [4] A. Gropp, L. Yariv, N. Haim, M. Atzmon, and Y. Lipman, *Implicit geometric regularization for learning shapes*, 2020. arXiv: 2002.10099 [cs.LG].
- 129  
130  
131  
132  
133  
134  
135

- 136 [5] M. Atzmon and Y. Lipman, *Sal: Sign agnostic learning of shapes from raw data*, 2020. arXiv:  
137 1911.10414 [cs.CV].
- 138 [6] Y. Lipman, *Phase transitions, distance functions, and implicit neural representations*, 2021.  
139 arXiv: 2106.07689 [cs.LG].
- 140 [7] M. Berger, J. A. Levine, L. G. Nonato, G. Taubin, and C. T. Silva, “A benchmark for surface  
141 reconstruction,” *ACM Trans. Graph.*, vol. 32, no. 2, Apr. 2013, ISSN: 0730-0301. DOI: 10.  
142 1145/2451236.2451246. [Online]. Available: [https://doi.org/10.1145/2451236.](https://doi.org/10.1145/2451236.2451246)  
143 2451246.
- 144 [8] F. Williams, M. Trager, J. Bruna, and D. Zorin, “Neural splines: Fitting 3d surfaces with  
145 infinitely-wide neural networks,” in *Proceedings of the IEEE/CVF Conference on Computer*  
146 *Vision and Pattern Recognition*, 2021, pp. 9949–9958.
- 147 [9] L. Mescheder, M. Oechsle, M. Niemeyer, S. Nowozin, and A. Geiger, *Occupancy networks:*  
148 *Learning 3d reconstruction in function space*, 2019. arXiv: 1812.03828 [cs.CV].
- 149 [10] A. X. Chang, T. Funkhouser, L. Guibas, *et al.*, *Shapenet: An information-rich 3d model*  
150 *repository*, 2015. arXiv: 1512.03012 [cs.GR].
